# Supplementary material for: Catalytic one-step synthesis of Pt-decorated few-layer graphenes
Source: Royal Society of Chemistry journal article supplement (doi:10.1039/c3ra44564j), 2013-01-01
Supplement: c3ra44564j.pdf [file c3ra44564j.pdf]

## Supporting Information

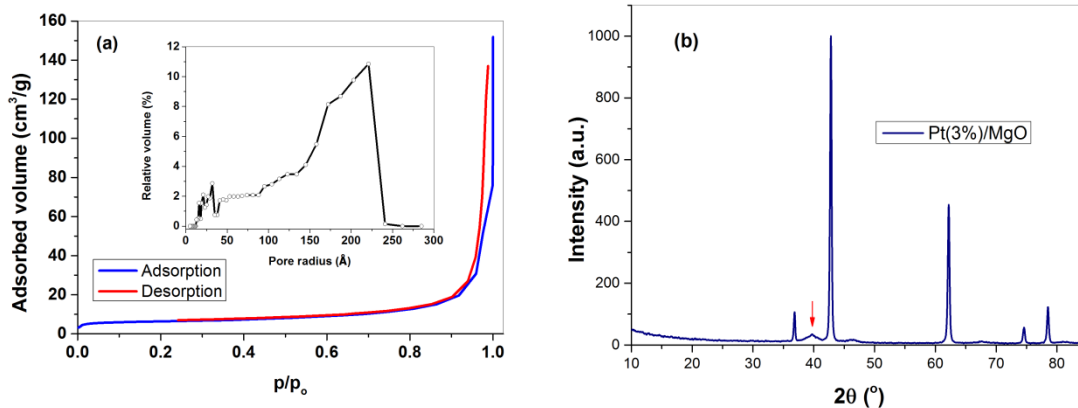

**Fig. 1.** Nitrogen adsorption–desorption isotherms for Pt(1%)/MgO; Inset represents the pores' size distribution with a maximum at 22 nm (a); XRD diffraction pattern of Pt(3%)/MgO (b); the arrow indicates the Pt diffraction peak while the rest of the diffraction peaks are due to crystalline MgO.

(a)

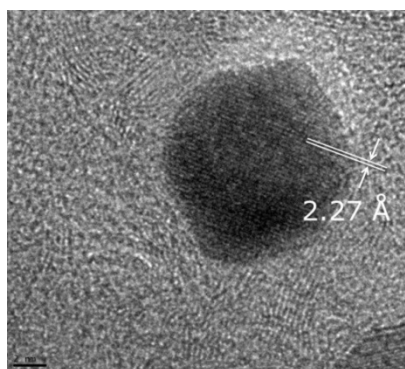

(b)

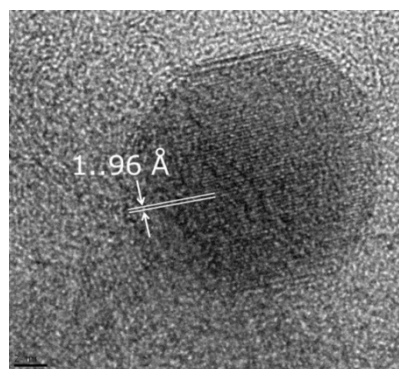

(c)

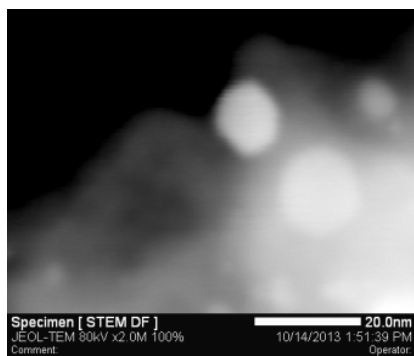

(d)

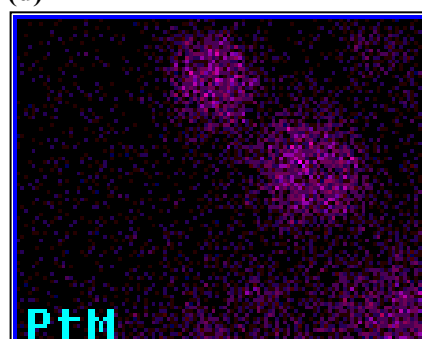

**Fig. 2.** High resolution TEM microscopy of the Pt nanoparticles in the graphene sample (Pt (3%)-1000-100). The atomic interplanar distances correspond to Pt (111) (a) and Pt (002) (b). STEM analysis of the same sample, indicating that the metallic nanoparticles are composed of Pt.

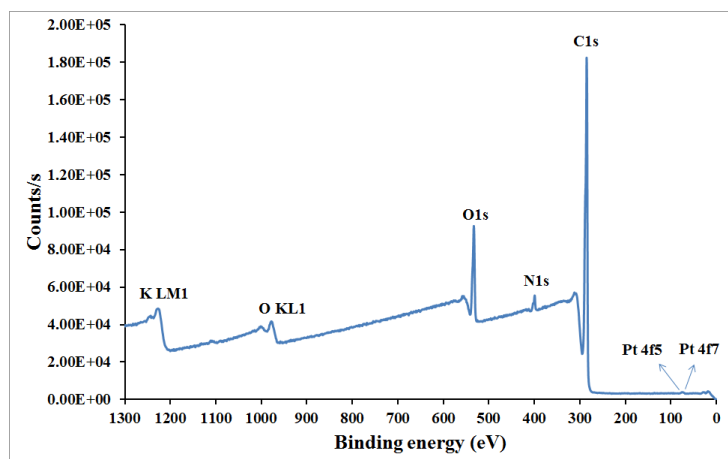

**Fig. 3.** X-Ray Photoelectron spectroscopy (XPS) wide scan analysis of the Pt(2%)-1000-100-30 sample.

**Table 1.** Main characteristics ( $I_G/I_D$ ,  $I_G/I_{2D}$ , FWHM si  $L_a$ ) of the graphenes Pt(x%)-1000-100-30 ( $x = 1, 2$ , and  $3\%$ ) obtained from the Raman analysis collected with a 514 nm laser excitation. The values presented here represent the averages of measurements collected at 6 different points over the surface of the samples.

| Sample             | $I_G/I_D$                                                                            | $I_G/I_{2D}$                                                                     | FWHM (2D) ( $\text{cm}^{-1}$ )                                                            | $L_a$ (nm) |
|--------------------|--------------------------------------------------------------------------------------|----------------------------------------------------------------------------------|-------------------------------------------------------------------------------------------|------------|
| Pt(1%)-1000-100-30 | 0.73; 0.77; 0.74;<br>0.72; 0.72; 0.75; 0.74<br><b><math>0.74 \pm 0.01</math></b>     | 2.08; 1.84; 2.1; 2.31;<br>1.93; 1.77; 1.79;<br><b><math>1.97 \pm 0.16</math></b> | 101.5; 106.2; 103.3;<br>103.7; 102.9; 104.7;<br>105;<br><b><math>103.9 \pm 1.2</math></b> | 12.28      |
| Pt(2%)-1000-100-30 | 0.8; 0.83; 0.83; 0.8;<br>0.81; 0.82;<br><b><math>0.82 \pm 0.11</math></b>            | 1.92; 1.93; 1.87;<br>1.87; 1.72; 1.87;<br><b><math>1.86 \pm 0.05</math></b>      | 105.8; 102.6; 105.7;<br>107.2; 103.2; 106.4;<br><b><math>105.1 \pm 1.52</math></b>        | 13.28      |
| Pt(3%)-1000-100-30 | 0.77; 0.84; 0.78;<br>0.77; 0.75; 0.79;<br>0.83;<br><b><math>0.79 \pm 0.03</math></b> | 2.2; 2.07; 2.25; 2.06;<br>2.17; 2.31; 1.99;<br><b><math>2.15 \pm 0.09</math></b> | 111.6; 114.2; 113.3;<br>107.4; 107.4; 111.5;<br>113;<br><b><math>111.2 \pm 2.2</math></b> | 13.11      |

**Table 2.** Main characteristics ( $I_G/I_D$ ,  $I_G/I_{2D}$ , FWHM si  $L_a$ ) of the Pt(2%)-t-100-30 ( $t = 800, 900$  and  $1000\text{ }^\circ\text{C}$ ) graphenes, obtained from the Raman analysis performed with a 514 nm laser excitation. The values presented here represent the averages of measurements collected at 6 different points on the surface of the samples.

| Sample             | $I_G/I_D$                                                                   | $I_G/I_{2D}$                                                                | FWHM (2D) ( $\text{cm}^{-1}$ )                                                     | $L_a$ (nm) |
|--------------------|-----------------------------------------------------------------------------|-----------------------------------------------------------------------------|------------------------------------------------------------------------------------|------------|
| Pt(2%)-800-100-30  | 0.97; 0.95; 0.96;<br>0.96; 0.82; 0.83;<br><b><math>0.92 \pm 0.13</math></b> | 3.12; 1.68; 1.68;<br>1.74; 1.65; 1.66;<br><b><math>1.92 \pm 0.68</math></b> | 124; 105.8; 103.9; 106.4;<br>106.2; 106.9;<br><b><math>113.9 \pm 8.4</math></b>    | 15.19      |
| Pt(2%)-900-100-30  | 0.83; 0.83; 0.84;<br>0.83; 0.8; 0.8;<br><b><math>0.82 \pm 0.02</math></b>   | 1.69; 1.81; 2.03;<br>2.2; 2.16; 2.53;<br><b><math>2.07 \pm 0.23</math></b>  | 103.0; 111.9; 97.3;<br>109.5; 108.3; 114.8;<br><b><math>107.5 \pm 4.9</math></b>   | 13.61      |
| Pt(2%)-1000-100-30 | 0.8; 0.83; 0.83; 0.8;<br>0.81; 0.82;<br><b><math>0.81 \pm 0.11</math></b>   | 1.92; 1.93; 1.87;<br>1.87; 1.72; 1.87;<br><b><math>1.86 \pm 0.05</math></b> | 105.8; 102.6; 105.7;<br>107.2; 103.2; 106.4;<br><b><math>105.1 \pm 1.52</math></b> | 13.23      |

**Table 3.** Main characteristics obtained by the interpretation of the TGA/DTA curves for the Pt(2%)-1000-f-30 (where f = 50, 75, 100 and 125 mL/min) samples.

| Sample             | $\eta_s^a$ (%) | Purity (%) | Thermal decomposition temperature (°C) |
|--------------------|----------------|------------|----------------------------------------|
| Pt(2%)-1000-50-30  | 28             | 92         | 528.8                                  |
| Pt(2%)-1000-75-30  | 29             | 94.5       | 544.1                                  |
| Pt(2%)-1000-100-30 | 31             | 94         | 544.7                                  |
| Pt(2%)-1000-125-30 | 35             | 96         | 551.5                                  |

<sup>a</sup>  $\eta_s$  synthesis yield values were calculated based on the amount that burned off as a percentage of the entire sample mass of the catalyst.

**Table 4.** Main characteristics ( $I_G/I_D$ ,  $I_G/I_{2D}$ , FWHM and  $L_a$ ) of the Pt(2%)-1000-f-30 (where f = 50, 75, 100, and 125 mL/min) graphenes obtained from the Raman analysis performed with a 514 nm laser excitation. The values presented here represent the averages of measurements collected at 6 different points on the surface of the samples.

| Sample             | $I_G/I_D$                                                    | $I_G/I_{2D}$                                                 | FWHM (2D) (cm <sup>-1</sup> )                                       | $L_a$ (nm) |
|--------------------|--------------------------------------------------------------|--------------------------------------------------------------|---------------------------------------------------------------------|------------|
| Pt(2%)-1000-50-30  | 0.76; 0.84; 0.74;<br>0.78; 0.76; 0.76;<br><b>0.77 ± 0.02</b> | 1.9; 1.8; 1.8; 2.0; 1.7;<br>1.75;<br><b>1.83 ± 0.08</b>      | 100.1; 101.8; 97.2;<br>103.7; 99.3; 102.5;<br><b>100.8 ± 1.4</b>    | 12.78      |
| Pt(2%)-1000-75-30  | 0.83; 0.80; 0.79;<br>0.84; 0.76; 0.76;<br><b>0.8 ± 0.03</b>  | 1.96; 1.98; 2.09;<br>2.04; 2.1; 2.01;<br><b>2.03 ± 0.05</b>  | 109.4; 104.7; 106.8;<br>105.8; 106.3; 108.9;<br><b>107 ± 1.7</b>    | 13.28      |
| Pt(2%)-1000-100-30 | 0.8; 0.83; 0.83; 0.8;<br>0.81; 0.82;<br><b>0.82 ± 0.11</b>   | 1.92; 1.93; 1.87;<br>1.87; 1.72; 1.87;<br><b>1.86 ± 0.05</b> | 105.8; 102.6; 105.7;<br>107.2; 103.2; 106.4;<br><b>105.1 ± 1.52</b> | 13.28      |
| Pt(2%)-1000-125-30 | 0.87; 0.83; 0.84;<br>0.83; 0.82; 0.84;<br><b>0.84 ± 0.01</b> | 1.96; 2.04; 2.01;<br>2.02; 2.11; 2.11;<br><b>2.04 ± 0.04</b> | 108.5; 110.1; 107.3;<br>105.6; 109.8; 116.3;<br><b>109.6 ± 2.5</b>  | 13.94      |

**Table 5.** Main characteristics obtained from TGA/DTA analysis for the Pt(2%)-1000-100-t (where t = 15, 30, and 45 min) samples.

| Sample             | $\eta_s^a$ (%) | Purity (%) | Thermal decomposition temperature (°C) |
|--------------------|----------------|------------|----------------------------------------|
| Pt(2%)-1000-100-15 | 11.9           | 91.3       | 565.3                                  |
| Pt(2%)-1000-100-30 | 29.4           | 93.9       | 544.7                                  |
| Pt(2%)-1000-100-45 | 30.7           | 93.3       | 540.8                                  |

<sup>a</sup>  $\eta_s$  synthesis yield values were calculated based on the amount that burned off as a percentage of the entire sample mass of the catalyst.

**Table 6.** Main parameters ( $I_G/I_D$ ,  $I_G/I_{2D}$ , FWHM and  $L_a$ ) of the Pt(2%)-1000-100-t (t = 5, 15, 30, and 45 min) graphenes obtained from the analysis of the Raman spectra collected with a laser excitation of 514 nm. The values presented here represent the averages of measurements collected at 6 different points on the surface of the samples.

| Sample             | $I_G/I_D$                                                                   | $I_G/I_{2D}$                                                                | FWHM (2D) ( $\text{cm}^{-1}$ )                                                     | $L_a$ (nm) |
|--------------------|-----------------------------------------------------------------------------|-----------------------------------------------------------------------------|------------------------------------------------------------------------------------|------------|
| Pt(2%)-1000-100-5  | 0.69; 0.73; 0.72;<br>0.72; 0.72; 0.72;<br><b><math>0.72 \pm 0.01</math></b> | 1.71; 1.58; 1.62;<br>1.74; 1.61; 1.61;<br><b><math>1.64 \pm 0.52</math></b> | 88.7; 91.6; 88.5; 94.0;<br>90.8; 92.5;<br><b><math>91 \pm 1.68</math></b>          | 11.95      |
| Pt(2%)-1000-100-15 | 0.71; 0.68; 0.74;<br>0.69; 0.8; 0.70;<br><b><math>0.72 \pm 0.33</math></b>  | 1.72; 1.77; 1.73;<br>1.89; 1.73; 1.72;<br><b><math>1.76 \pm 0.47</math></b> | 90.3; 90.8; 96.6; 91.0;<br>90.7; 90.3;<br><b><math>91.6 \pm 1.65</math></b>        | 11.96      |
| Pt(2%)-1000-100-30 | 0.8; 0.83; 0.83;<br>0.8; 0.81; 0.82;<br><b><math>0.82 \pm 0.11</math></b>   | 1.92; 1.93; 1.87;<br>1.87; 1.72; 1.87;<br><b><math>1.86 \pm 0.05</math></b> | 105.8; 102.6; 105.7;<br>107.2; 103.2; 106.4;<br><b><math>105.1 \pm 1.52</math></b> | 13.23      |
| Pt(2%)-1000-100-45 | 0.79; 0.77; 0.8;<br>0.83; 0.84; 0.86;<br><b><math>0.81 \pm 0.03</math></b>  | 1.63; 1.66; 1.7;<br>1.61; 1.64; 1.42;<br><b><math>1.61 \pm 0.35</math></b>  | 96.9; 103.9; 99.7; 98;<br>97.3; 101;<br><b><math>99.5 \pm 2.07</math></b>          | 13.45      |
